# Supplementary material
Source: Springer Nature journal article supplement (https://www.springermedizin.de/resource/supplementary/13063_2008_331_MOESM2_ESM.pdf/9617998)
Supplement: MOESM2 [file 9617998]

### Guidelines for Journal Editors:

- Recognize that interpreting subgroup analysis without a statistical test of heterogeneity or interaction is not good practice.
- Encourage authors to supply the following information in the paper or in an electronic appendix available to all readers:
  - A list of *all* variables examined for HTE;
  - Effect sizes, confidence intervals, and statistical significance for all subgroups examined;
  - A clear description delineating which variables were pre-specified and which were exploratory (post hoc);
  - Exact p-values for tests of interaction or heterogeneity.

### Guidelines for Authors:

- Recognize that interpreting subgroup analysis without a statistical test of heterogeneity or interaction is not good practice.
- Provide a clear statement regarding both **clinical** and **statistical** significance for any analyses involving interaction or heterogeneity.
- Supply readers with a conclusion regarding heterogeneity and interaction effects based on the following:
  - Evidence is sufficient to guide different treatment recommendations in one or more subgroups;
  - Evidence is insufficient to guide different treatment recommendations for one or more subgroups, but sufficient to warrant future research with pre-specified hypotheses;
  - Evidence is sufficient to recommend uniform treatment across all subgroups;
  - Evidence is insufficient to draw any conclusions about HTE.
